# Supplementary material for: Effect of Age on Heart Rate Variability in Patients with Mitral Valve Prolapse: An Observational Study
Source: MDPI journal article supplement (doi:10.3390/jcm12010165), 2022-12-25
Supplement: s1 [file s1]

**Table S1. The full results of multivariable quantile regression for the association between MVP and HRV parameters**

| HRV parameters/ predictors | Regression coefficient (95% CI) | P value |
|----------------------------|---------------------------------|---------|
| SDNN, ms                   |                                 |         |
| MVP                        | 3.6 (-8.6, 15.8)                | 0.560   |
| Age, year                  | -0.37 (-0.69, -0.05)            | 0.024   |
| Male                       | 9.5 (-3.6, 22.5)                | 0.154   |
| Smoking                    | -6.3 (-24.1, 11.6)              | 0.490   |
| RMSSD, ms                  |                                 |         |
| MVP                        | -1.5 (-7.3, 4.2)                | 0.602   |
| Age, year                  | -0.17 (-0.32, -0.02)            | 0.025   |
| Male                       | -1.8 (-8.0, 4.3)                | 0.555   |
| Smoking                    | 6.9 (-1.4, 15.3)                | 0.104   |
| NN50                       |                                 |         |
| MVP                        | 38.3 (-2494.6, 2571.2)          | 0.976   |
| Age, year                  | -156.4 (-223.3, -89.6)          | <0.001  |
| Male                       | -1336.3 (-4041.3, 1368.6)       | 0.331   |
| Smoking                    | 3816.1 (116.9, 7515.3)          | 0.043   |
| PNN50, %                   |                                 |         |
| MVP                        | 0.35 (-2.49, 3.19)              | 0.810   |
| Age, year                  | -0.13 (-0.21, -0.06)            | 0.001   |
| Male                       | -1.4 (-4.4, 1.7)                | 0.369   |
| Smoking                    | 4.2 (0.0, 8.3)                  | 0.049   |
| RR interval                |                                 |         |
| mean, ms <sup>2</sup>      |                                 |         |
| MVP                        | 5.6 (-36.2, 47.4)               | 0.792   |
| Age, year                  | 2.56 (1.46, 3.67)               | <0.001  |
| Male                       | -7.9 (-52.5, 36.8)              | 0.729   |
| Smoking                    | 6.9 (-54.1, 68.0)               | 0.823   |
| VLF, ms <sup>2</sup>       |                                 |         |
| MVP                        | 246.1 (-749.4, 1241.5)          | 0.626   |
| Age, year                  | 25.4 (-0.7, 51.5)               | 0.056   |
| Male                       | -473.3 (-1530.6, 583.9)         | 0.378   |
| Smoking                    | 365.0 (-1090.8, 1820.9)         | 0.621   |
| LF, ms <sup>2</sup>        |                                 |         |
| MVP                        | -81.5 (-1128.5, 965.4)          | 0.878   |
| Age, year                  | 37.7 (10.2, 65.1)               | 0.007   |
| Male                       | -330.0 (-1442.0, 781.9)         | 0.559   |
| Smoking                    | 239.1 (-1292.0, 1770.3)         | 0.758   |
| HF, ms <sup>2</sup>        |                                 |         |
| MVP                        | -79.1 (-713.7, 555.5)           | 0.806   |
| Age, year                  | 13.3 (-3.3, 29.9)               | 0.117   |
| Male                       | -297.6 (-971.6, 376.4)          | 0.385   |
| Smoking                    | 253.6 (-674.5, 1181.7)          | 0.590   |
| Total, ms <sup>2</sup>     |                                 |         |

|             |                          |       |
|-------------|--------------------------|-------|
| MVP         | -229.5 (-2821.7, 2362.7) | 0.861 |
| Age, year   | 69.5 (1.6, 137.4)        | 0.045 |
| Male        | -797.5 (-3550.6, 1955.7) | 0.568 |
| Smoking     | -268.5 (-4059.5, 3522.5) | 0.889 |
| LF/HF ratio |                          |       |
| MVP         | -0.10 (-0.51, 0.32)      | 0.653 |
| Age, year   | -0.01 (-0.02, 0.01)      | 0.367 |
| Male        | -0.02 (-0.46, 0.42)      | 0.929 |
| Smoking     | 0.02 (-0.59, 0.62)       | 0.961 |

CI, confidence interval.
